# Supplementary material for: Effect of diluent chain length on the performance of the electrochemical DNA sensor at elevated temperature
Source: Royal Society of Chemistry journal article supplement (doi:10.1039/c0an00644k), 2010-10-06
Supplement: c0an00644k.pdf [file c0an00644k.pdf]

## **Supporting Information**

### **Effect of Diluent Chain Length on the Performance of the Electrochemical DNA Sensor at Elevated Temperature**

Weiwei Yang and Rebecca Y. Lai\*

Department of Chemistry  
University of Nebraska-Lincoln  
Lincoln, NE 68588

\*Correspondence should be addressed to Rebecca Y. Lai.

Phone: (402) 472-5340

Fax: (4-02) 472-9402

E-mail: rlai2@unl.edu

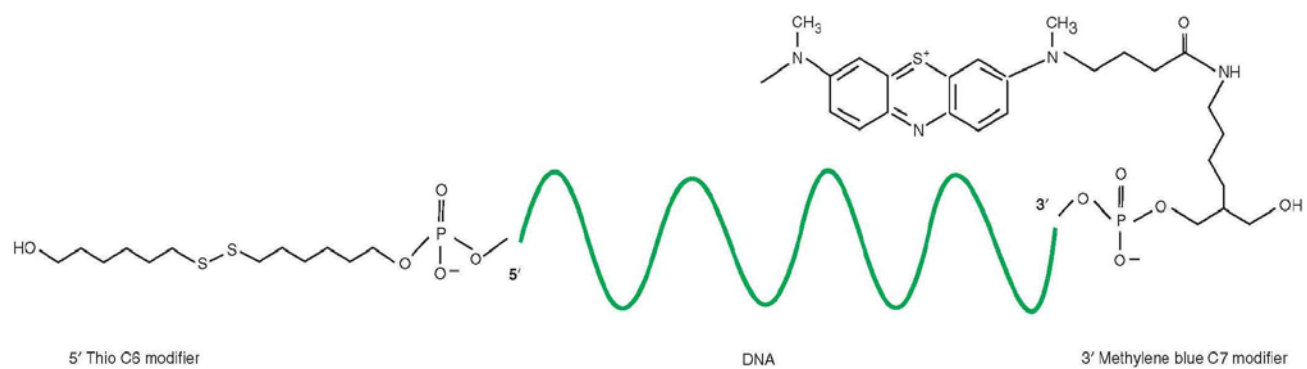

**Fig. S-1** Structure of the dual-labeled DNA probe used in this study.

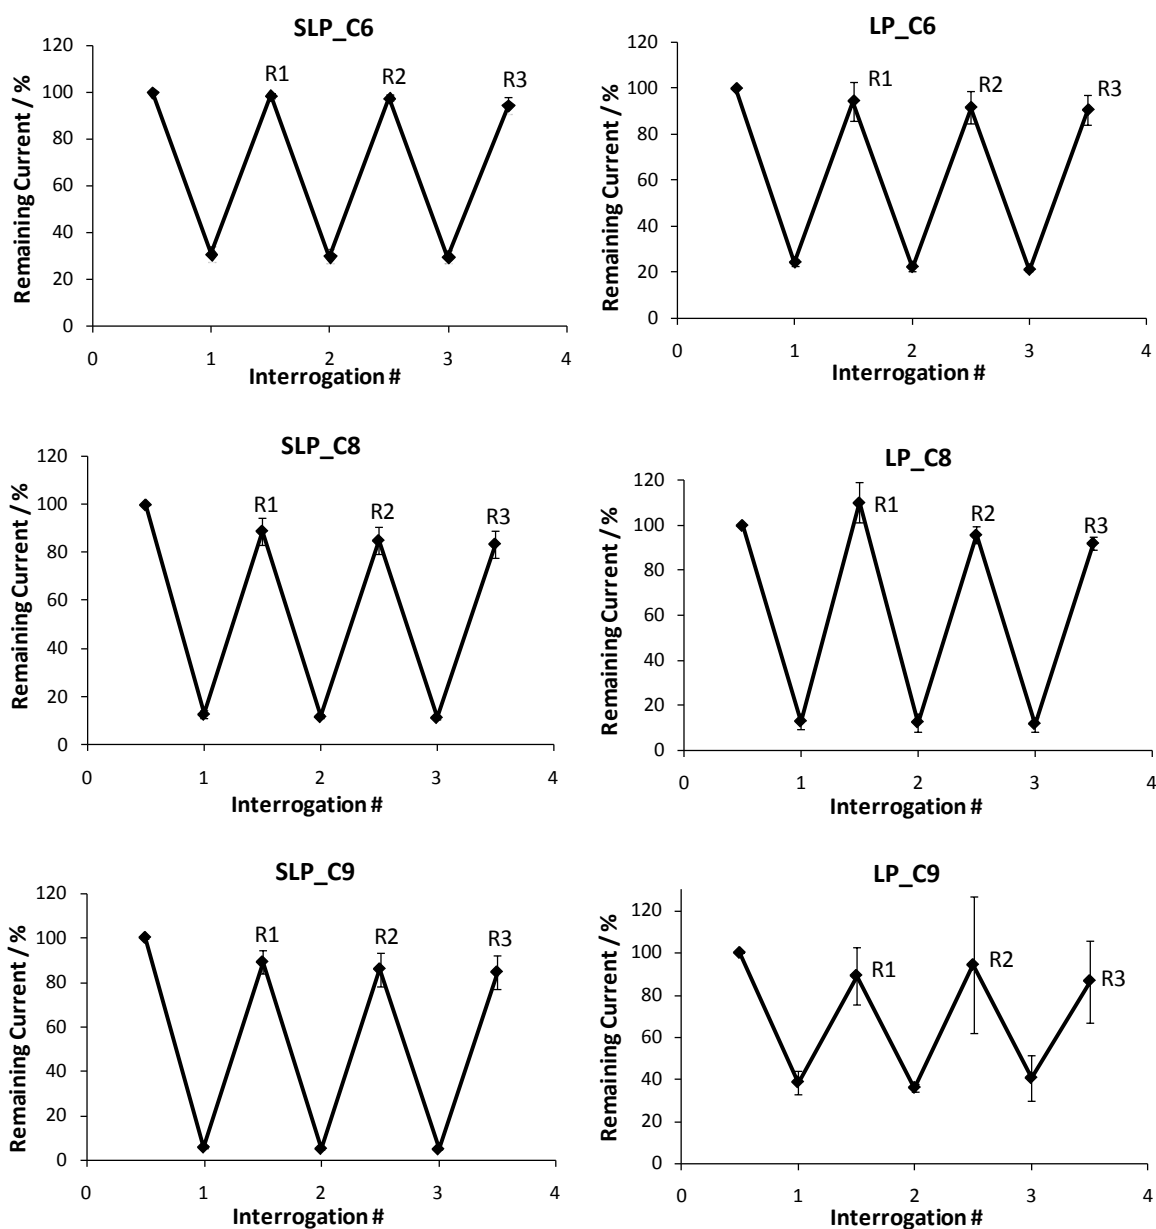

**Fig. S-2** SLP and LP E-DNA sensors fabricated with alkanethiols with different chain lengths show different sensor regeneration capability. SLP sensors display relatively similar sensor regenerability regardless of the diluent chain length. LP sensors passivated with C9 show poorer sensor regenerability and reproducibility.

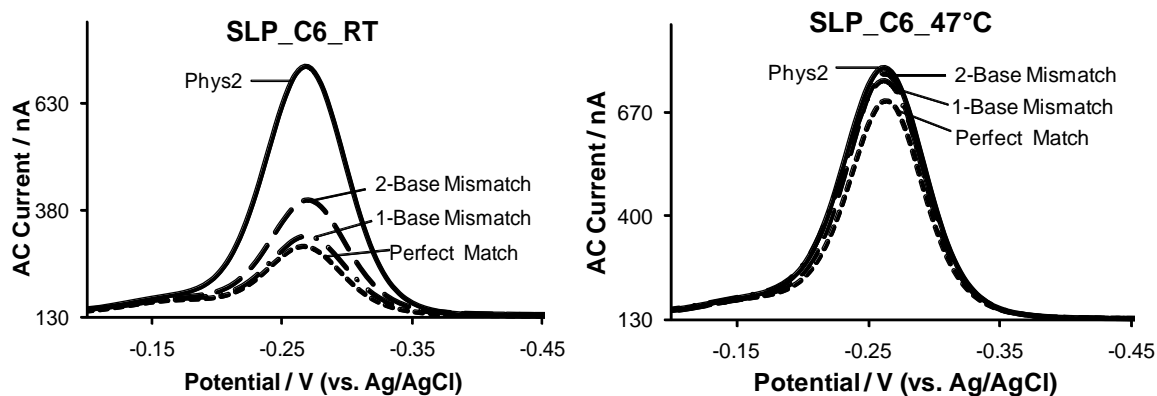

**Fig. S-3** Mismatch discrimination capability of **SLP** E-DNA sensors passivated with C6 at room temperature (RT,  $21\pm1^\circ\text{C}$ ) and elevated temperature ( $47\pm1^\circ\text{C}$ ). The concentration of each target DNA was  $1.0\ \mu\text{M}$  in a Phys2 buffer (pH 7.4). Of note, the signaling mechanism of the **SLP** sensor at both temperatures should essentially be the same since our circular dichroism data suggest that the probes maintain their stem-loop conformation even when heated to  $47^\circ\text{C}$ .

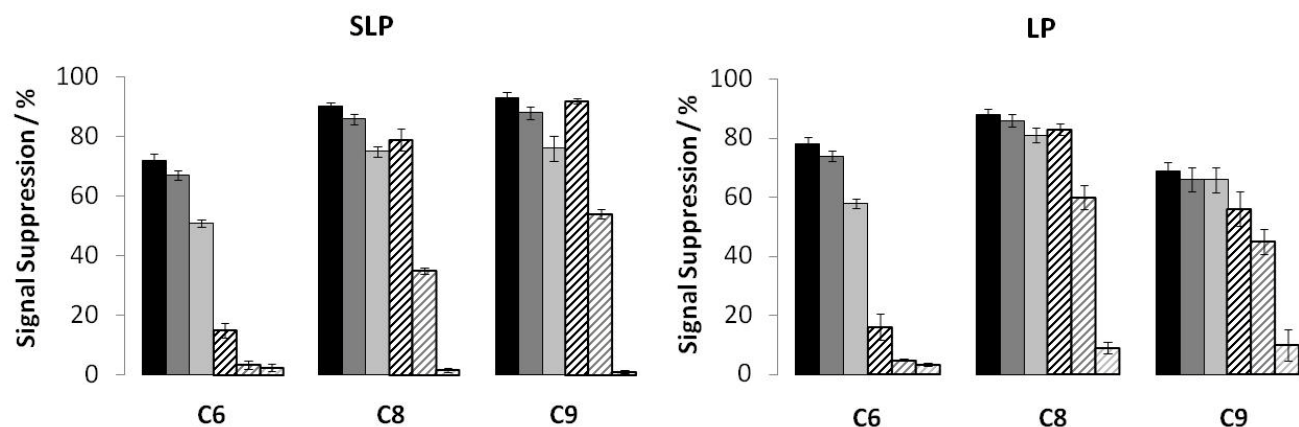

**Fig. S-4** Mismatch discrimination capability of E-DNA sensors fabricated with different passivating diluents at room temperature (RT,  $21\pm1^\circ\text{C}$ ) and high temperature ( $47\pm1^\circ\text{C}$ ). ■ RT Perfect Match DNA target; ■ RT 1-Base Mismatch DNA target; ■ RT 2-Base Mismatch DNA target; ▨  $47^\circ\text{C}$  Perfect Match DNA target; ▨  $47^\circ\text{C}$  1-Base Mismatch DNA target; ▨  $47^\circ\text{C}$  2-Base Mismatch DNA target. Left: **SLP** E-DNA sensors; Right: **LP** E-DNA sensors. The concentration of each target DNA was  $1.0\ \mu\text{M}$  in a Phys2 buffer. Data are averages of three independent experiments and the standard deviations are given.
